# Supplementary material for: Multiple routes of communication within the amygdala-mPFC network: A comparative approach in humans and macaques
Source: PubMed Central journal article supplement — Curr Res Neurobiol. 2023 Jul 28;5:100103. doi: 10.1016/j.crneur.2023.100103 (PMC10432920; doi:10.1016/j.crneur.2023.100103), 2023-07-28
Supplement: mmc1.pdf [file mmc1.pdf]

## **SUPPLEMENTAL METHODS FOR:**

### **Multiple routes of communication within the amygdala-mPFC network: a comparative approach in humans and macaques**

#### **Authors**

Giacometti C<sup>1</sup>, Amiez C<sup>1\*</sup> and Hadj-Bouziane F<sup>2\*</sup>

\* Equal contribution

#### **Corresponding authors:**

##### **Camille Giacometti**

INSERM U1208, Stem Cell and Brain Research Institute, 69500 Bron, France.

E-mail address: camille.giacometti@inserm.fr

##### **Céline Amiez**

INSERM U1208, Stem Cell and Brain Research Institute, 69500 Bron, France.

E-mail address: celine.amiez@inserm.fr

##### **Fadila Hadj-Bouziane**

Integrative Multisensory Perception Action & Cognition Team (ImpAct), INSERM U1028, CNRS UMR5292, Lyon Neuroscience Research Center (CRNL), Lyon, France.

E-mail address: fadila.hadj-bouziane@inserm.fr

#### **Affiliations:**

<sup>1</sup> Univ Lyon, Université Lyon 1, Inserm, Stem Cell and Brain Research Institute U1208, 69500 Bron, France.

<sup>2</sup> Integrative Multisensory Perception Action & Cognition Team (ImpAct), INSERM U1028, CNRS UMR5292, Lyon Neuroscience Research Center (CRNL), Lyon, France; University of Lyon 1, Lyon, France.

The objective of the review was to identify potential homologies and differences in the network formed by the Amygdala (AMG) and medial prefrontal cortex (mPFC) between humans and macaques using anatomical and functional (i.e., resting-state fMRI) data. This analysis is based on a search in the Pubmed database using a combination of keywords in the advanced search builder.

## **Amygdala and nuclei volumes in humans, chimpanzees and macaques.**

### **Selected studies.**

We selected studies including the whole AMG volume and the volume of the main nuclei (namely, lateral, basal, accessory basal and central) in the three species. Importantly, given our aim to compare volumes between humans and non-human primate species (macaque, chimpanzee), we focused on 'ex-vivo' histological studies to ensure a similar quantification method between the 3 species. We excluded MRI volumetry studies from the present review given their scarcity in NHP and their inherently limited spatial resolution to access the details of the AMG nuclei in the 3 species compared to 'ex-vivo' histological studies.

We used a combination of keywords with Title/Abstract query box containing one or multiple of the following search terms: "Amygdala", "Amygdaloid complex", "Amygdala nuclei", "Volume", "Volumetric", "Stereological", "Post-mortem", "Ex-vivo" without any criterion regarding the dates of the studies. We also included "Primate", "Macaque" or "Chimpanzee". For macaques, we only included studies with rhesus macaque to avoid any interspecies differences and because this model is the most commonly used in cognitive neurosciences and notably in functional neuroimaging studies.

For the 3 species, we therefore selected ex-vivo stereological studies that specifically reported the volumes of the entire AMG and AMG main nuclei, as well as parameters such as the mean volume, standard deviation and sample size.

**Computation of the confidence interval at 95%.** Using the R software, we calculated the 95% confidence intervals around the mean of each study and specie:

$$CI = \bar{x} \pm t_{n-1, 1-\alpha/2} \times \frac{s}{\sqrt{n}}$$

$\bar{x}$  = mean volume;

t= calculated t.scores for a T distribution with  $n-1$  = degree of freedom and with a risk of 0.05 :  $1 - \alpha/2 = 0.975$  ;

$\frac{s}{\sqrt{n}}$  = the standard error of the mean calculated by dividing the sd by the square root of the sample size.

**Relative volume of amygdala nuclei.** The relative volume of AMG nuclei refers to the volume occupied by each nucleus within the whole AMG. In that goal, among the selected studies, we further selected the ones that contain both whole AMG and nuclei volume. For each species, we calculated the relative volume by dividing the volume of each nucleus with the whole AMG volume that we expressed as a percentage.

### **Amygdala and amygdala subregions resting-state functional connectivity in humans.**

**Selected studies.** Similarly, to what we have done for the volumes, we proceeded with a combination of keywords in the Pubmed database with Title/Abstract query box including “amygdala” AND “medial prefrontal cortex” AND “resting-state”. We then carried out a second search replacing the item “amygdala” by “amygdala nuclei” OR “amygdala subregions/subdivisions” AND with “resting-state”. Finally, we also carried out a search using the following items “basolateral” or “laterobasal” as well as “centromedial” and “central” AND “resting-state”. In the context of this review, we only considered studies reporting amygdala subregions presenting a significant peak of correlation with mPFC in adult healthy humans excluding study with children, adolescent and older adults.

**Studies processing.** To assess the functional connectivity of AMG subdivisions (laterobasal and centromedial) with mPFC regions, we positioned each correlation with significant peaks extracted from our selected studies on a midsagittal section diagram of the brain. Correlation peaks coordinates were expressed in MNI coordinates and positioned accordingly. Peak localizations were identified in the different mPFC subdivisions: vmPFC, ACC, MCCa and MCCp (gyrus or sulcus) nomenclature, based on sulci landmarks defined by C.A. We also removed significant peaks that were out of range (e.g., located in the corpus callosum for example). Note that for a few studies we converted Talairach coordinates into MNI coordinates.

## Tables

**Table S1. Summary of volumetric studies selected.**

| Study                                                                   | Species      | Sample (n) | AMG & nuclei      | Mean volume $\pm$ sd (mm <sup>3</sup> ) |
|-------------------------------------------------------------------------|--------------|------------|-------------------|-----------------------------------------|
| (Schumann and Amaral 2005; Schumann and Amaral 2006; Avino et al. 2018) | <u>Human</u> | 10         | AMG               | 1380 $\pm$ 114                          |
|                                                                         |              |            | LA                | 452 $\pm$ 43                            |
|                                                                         |              |            | BL                | 342 $\pm$ 30                            |
|                                                                         |              |            | BM                | 152 $\pm$ 16                            |
|                                                                         |              |            | CE                | 34 $\pm$ 6                              |
| (Berretta et al. 2007)                                                  |              | 11         | LA                | 243.01 $\pm$ 67.25                      |
|                                                                         |              |            | BL                | 151.37 $\pm$ 51.04                      |
|                                                                         |              |            | BM                | 69.58 $\pm$ 41.7                        |
| (Amunts et al. 2005; Kedo et al. 2018)                                  |              | 7          | AMG               | 1521 $\pm$ 279                          |
|                                                                         |              |            | LA                | 446 $\pm$ 62                            |
|                                                                         | BL           |            | 267 $\pm$ 43.5    |                                         |
|                                                                         | BM           |            | 131 $\pm$ 20      |                                         |
|                                                                         | CE           |            | 52 $\pm$ 9.5      |                                         |
| (García-Amado and Prensa 2012)                                          | 7            | AMG        | 956 $\pm$ 149     |                                         |
|                                                                         |              | LA         | 376 $\pm$ 68      |                                         |
|                                                                         |              | BL         | 259 $\pm$ 40      |                                         |
|                                                                         |              | BM         | 123 $\pm$ 21      |                                         |
|                                                                         |              | CE         | 60 $\pm$ 8        |                                         |
| (Wegiel et al. 2014)                                                    | 14           | LA         | 367 $\pm$ 13      |                                         |
|                                                                         |              | BL         | 211 $\pm$ 8       |                                         |
|                                                                         |              | BM         | 138 $\pm$ 6       |                                         |
|                                                                         |              | CE         | 20 $\pm$ 1        |                                         |
| (Rubinow et al. 2016)                                                   | 10           | LA         | 288 $\pm$ 16.9    |                                         |
|                                                                         |              | BL         | 224 $\pm$ 10.9    |                                         |
|                                                                         |              | BM         | 98 $\pm$ 3.5      |                                         |
| (Lew et al. 2018)                                                       | 7            | LA         | 362 $\pm$ 102.9   |                                         |
|                                                                         |              | BL         | 266.3 $\pm$ 90.08 |                                         |
|                                                                         |              | BM         | 109.5 $\pm$ 30.96 |                                         |
|                                                                         |              | CE         | 25.12 $\pm$ 7.37  |                                         |

|                                                |                       |    |     |              |
|------------------------------------------------|-----------------------|----|-----|--------------|
| (Barger et al. 2007)                           |                       | 3  | AMG | 657.5±77.20  |
|                                                |                       | 2  | LA  | 126.25±14.50 |
|                                                |                       |    | BL  | 212.25±38.54 |
|                                                |                       |    | BM  | 72.18±9.02   |
| (Stimpson et al. 2016)                         | <u>Chimpanzee</u>     | 7  | AMG | 851.3±150    |
|                                                |                       |    | LA  | 177±42.7     |
|                                                |                       |    | BL  | 245.9±59.7   |
|                                                |                       |    | BM  | 103±11.6     |
|                                                |                       |    | CE  | 48.6±17.7    |
| (Emery et al. 2001)                            |                       | 4  | AMG | 277.98±21.89 |
|                                                |                       |    | LA  | 57.14±4.51   |
|                                                |                       |    | BL  | 64.53±8.05   |
|                                                |                       |    | BM  | 37.89±3.89   |
|                                                |                       |    | CE  | 15.3±1.47    |
| (Carlo et al. 2010)                            | <u>Macaque rhesus</u> | 4  | AMG | 161.26±18.74 |
|                                                |                       |    | LA  | 34.23±5.08   |
|                                                |                       |    | BL  | 42±6.12      |
|                                                |                       |    | BM  | 19.97±1.73   |
|                                                |                       |    | CE  | 9.59±2.02    |
| (Chareyron et al. 2011; Chareyron et al. 2012) |                       | 5  | AMG | 192±6.26     |
|                                                |                       |    | LA  | 38.4±3.57    |
|                                                |                       |    | BL  | 47.15±2.67   |
|                                                |                       |    | BM  | 24.38±2.14   |
|                                                |                       |    | CE  | 8.15±1.44    |
| (Villard et al. 2021)                          |                       | 10 | AMG | 178.85±17.81 |
|                                                |                       |    | LA  | 33.32±4.95   |
|                                                |                       |    | BL  | 39.49±5.83   |
|                                                |                       |    | BM  | 23.10±1.30   |
|                                                |                       |    | CE  | 4.70±0.70    |

**Table S2. Functional connectivity peaks between AMG subdivisions and mPFC in each study.**

| Studies                 | Protocol                                | Sample (n) | AMG Seeds            | Parcellation Methodology              | Hemisphere      | mPFC regions coordinate (MNI) |     |             | mPFC Region | Correlation sign |
|-------------------------|-----------------------------------------|------------|----------------------|---------------------------------------|-----------------|-------------------------------|-----|-------------|-------------|------------------|
|                         |                                         |            |                      |                                       |                 | X                             | Y   | Z           |             |                  |
| (Roy et al. 2009)       | 3T<br>Eyes open<br>197 vol<br>(1)(2)(3) | 65         | LB                   | SPM Anatomy Toolbox Probabilistic map | Right           | 4                             | 40  | -18         | vmPFC       | Positive         |
|                         |                                         |            |                      |                                       |                 | 6                             | 24  | 28          | aMCC gyrus  | Negative         |
|                         |                                         |            |                      |                                       |                 | -2                            | 40  | 8           | ACC         | Negative         |
|                         |                                         |            |                      |                                       | Left            | 4                             | -28 | 26          | PCC         | Negative         |
|                         |                                         |            |                      |                                       |                 | 0                             | 20  | 40          | aMCC sulcus | Negative         |
|                         |                                         |            |                      |                                       |                 | 6                             | 30  | 20          | aMCC gyrus  | Negative         |
|                         |                                         |            | CM                   |                                       | 4               | 44                            | 0   | ACC         | Negative    |                  |
|                         |                                         |            |                      |                                       | Right           | 8                             | 8   | 34          | aMCC gyrus  | Positive         |
|                         |                                         |            |                      |                                       |                 | -10                           | -12 | 40          | pMCC sulcus | Positive         |
|                         |                                         |            | 0                    |                                       |                 | 52                            | -8  | vmPFC       | Negative    |                  |
|                         |                                         |            | Left                 |                                       | 0               | 34                            | -18 | vmPFC       | Negative    |                  |
|                         |                                         |            |                      |                                       | -4              | 22                            | 26  | aMCC gyrus  | Positive    |                  |
| -6                      | 4                                       | 38         | aMCC                 | Positive                              |                 |                               |     |             |             |                  |
| (Tahmasian et al. 2013) | 3T<br>Eyes closed<br>300 vol<br>(1)(2)  | 20         | LB                   | SPM Anatomy Toolbox Probabilistic map | Right/Left      | 3                             | 24  | 36          | aMCC        | Negative         |
| (Coombes et al. 2014)   | 3T<br>Eyes open<br>124 vol<br>(1)(2)(3) | 38         | LB                   | SPM Anatomy Toolbox Probabilistic map | Right           | 5                             | 31  | 38          | aMCC        | Negative         |
|                         |                                         |            |                      |                                       | Left            | -6                            | 23  | -22         | vmPFC       | Negative         |
| (Shao et al. 2014)      | 3T<br>Eyes closed<br>189 vol<br>(1)(2)  | 14         | LB                   | SPM Anatomy Toolbox Probabilistic map | Right           | 5                             | 49  | 16          | ACC         | Negative         |
|                         |                                         |            | CM                   |                                       | Right           | 1                             | 0   | 45          | pMCC sulcus | Positive         |
| (Nicholson et al. 2015) | 3T<br>Eyes closed<br>120 vol<br>(1)(2)  | 40         | LB                   | SPM Anatomy Toolbox Probabilistic map | Left            | -4                            | -10 | 44          | pMCC sulcus | Positive         |
|                         |                                         |            |                      |                                       |                 | -6                            | 12  | 40          | aMCC sulcus | Positive         |
|                         |                                         |            | Left                 |                                       | -8              | 8                             | 44  | aMCC sulcus | Positive    |                  |
|                         |                                         |            |                      |                                       | 6               | 8                             | 34  | aMCC gyrus  | Positive    |                  |
|                         |                                         |            |                      |                                       | -4              | 6                             | 38  | aMCC gyrus  | Positive    |                  |
|                         |                                         |            |                      |                                       | Right           | -4                            | 12  | 36          | aMCC sulcus | Positive         |
|                         |                                         |            | 6                    |                                       |                 | 8                             | 46  | aMCC sulcus | Positive    |                  |
|                         |                                         |            | -2                   |                                       |                 | 16                            | 48  | aMCC        | Positive    |                  |
|                         |                                         |            | -4                   |                                       |                 | 18                            | 44  | aMCC        | Positive    |                  |
|                         |                                         |            | (Engman et al. 2016) |                                       | 3T<br>Eyes open | 96                            | LB  |             | Left        | 4                |
| 2                       | -4                                      | 40         |                      | pMCC gyrus                            |                 |                               |     |             |             | Positive         |

|                         |                                                      |     |    |                                                                                 |       |       |       |       |                  |          |
|-------------------------|------------------------------------------------------|-----|----|---------------------------------------------------------------------------------|-------|-------|-------|-------|------------------|----------|
|                         | 124 vol<br>(1)(2)(3)                                 |     | CM | SPM<br>Anatomy<br>Toolbox<br>Probabilistic<br>map                               | Right | 8     | 30    | 36    | aMCC             | Negative |
|                         |                                                      |     |    |                                                                                 | Left  | 4     | 6     | 40    | aMCC<br>gyrus    | Positive |
|                         |                                                      |     |    |                                                                                 | Right | -12   | 4     | 44    | aMCC<br>sulcus   | Positive |
|                         |                                                      |     |    |                                                                                 |       | 6     | -14   | 36    | pMCC             | Positive |
|                         |                                                      |     |    |                                                                                 | Left  | 2     | 48    | -16   | vmPFC            | Positive |
| (Kerestes et al. 2017)  | 3T<br>Eyes close<br>260 vol<br>(1)(2)                | 200 | LB | SPM<br>Anatomy<br>Toolbox<br>Probabilistic<br>map                               | Right | 0     | 44    | -18   | vmPFC            | Positive |
|                         |                                                      |     |    |                                                                                 | Left  | 4     | 34    | 38    | aMCC             | Negative |
|                         |                                                      |     |    |                                                                                 |       | 2     | 52    | -16   | vmPFC            | Positive |
|                         |                                                      |     |    |                                                                                 |       | 2     | -22   | 30    | PCC              | Negative |
|                         |                                                      |     |    |                                                                                 |       | 0     | -26   | 28    | PCC              | Negative |
| (Caparelli et al. 2017) | HCP subject<br>3T<br>Eyes open<br>1200 vol<br>(1)(2) | 100 | LB | SPM<br>Anatomy<br>Toolbox<br>Probabilistic<br>map                               | Right | 0     | -4    | 48    | pMCC             | Positive |
|                         |                                                      |     | CM |                                                                                 |       |       |       |       |                  |          |
| (Eckstein et al. 2017)  | 1.5T<br>Eyes closed<br>110 vol<br>(2)                | 52  | LB | SPM<br>Anatomy<br>Toolbox<br>Probabilistic<br>map                               | Left  | -2    | 26    | 44    | aMCC             | Negative |
|                         |                                                      |     |    |                                                                                 | Left  | 9     | 1.5   | 49.5  | pMCC             | Positive |
|                         |                                                      |     |    |                                                                                 |       | -9    | -24   | 45    | PCC              | Positive |
|                         |                                                      |     |    |                                                                                 | Right | 3     | -13.5 | 42    | pMCC<br>gyrus    | Positive |
|                         |                                                      |     |    |                                                                                 |       | 3     | -22.5 | 25.5  | RSC              | Negative |
|                         |                                                      |     |    |                                                                                 |       | -9    | 39    | 21    | aMCC             | Negative |
|                         |                                                      |     |    |                                                                                 |       | 4.5   | 28.5  | 36    | aMCC<br>sulcus   | Negative |
| (Zhang et al. 2018)     | 7T<br>Eyes closed<br>200 vol<br>(1)(2)(3)            | 20  | LB | SPM<br>Anatomy<br>Toolbox<br>Probabilistic<br>map<br>& data-based<br>clustering | Left  | 0     | 3     | 37.5  | pMCC<br>gyrus    | Positive |
|                         |                                                      |     | CM |                                                                                 |       | -1.5  | 24    | 16.5  | aMCC<br>gyrus    | Positive |
|                         |                                                      |     |    |                                                                                 | /     | 12.7  | 31.93 | 24.62 | aMCC<br>sulcus   | Negative |
|                         |                                                      |     |    |                                                                                 |       | -10.4 | 31.64 | 22.57 | aMCC<br>sulcus   | Negative |
|                         |                                                      |     |    |                                                                                 | /     | 6.1   | 30.9  | -11.1 | vmPFC            | Positive |
|                         |                                                      |     |    |                                                                                 |       | -7    | 40.4  | -14.3 | vmPFC            | Positive |
|                         |                                                      |     |    |                                                                                 |       | 12.6  | 25.3  | 31    | aMCC –<br>sulcus | Negative |
|                         |                                                      |     |    |                                                                                 |       | -11.6 | 29.3  | 25.4  | aMCC<br>sulcus   | Negative |
| (Cao et al. 2022)       | 3T<br>Eyes closed<br>200 vol<br>(1)(2)               | 93  | CM | SPM<br>Anatomy<br>Toolbox<br>Probabilistic<br>map<br>& data-based<br>clustering |       | 9     | -6    | 48    | pMCC             | Positive |
|                         |                                                      |     | LB |                                                                                 |       | 9     | -6    | 48    | pMCC             | Positive |

- (1) Motion parameters regression  
(2) Cerebral Spinal Fluid (CSF) and White Matter (WM) regression  
(3) Global signal regression

## References

- Amunts K, Kedo O, Kindler M, Pieperhoff P, Mohlberg H, Shah NJ, Habel U, Schneider F, Zilles K. 2005. Cytoarchitectonic mapping of the human amygdala, hippocampal region and entorhinal cortex: intersubject variability and probability maps. *Anat Embryol (Berl)*. 210(5–6):343–352. doi:10.1007/s00429-005-0025-5. <http://link.springer.com/10.1007/s00429-005-0025-5>.
- Avino TA, Barger N, Vargas M V., Carlson EL, Amaral DG, Bauman MD, Schumann CM. 2018. Neuron numbers increase in the human amygdala from birth to adulthood, but not in autism. *Proc Natl Acad Sci U S A*. 115(14):3710–3715. doi:10.1073/pnas.1801912115.
- Barger N, Stefanacci L, Semendeferi K. 2007. A comparative volumetric analysis of the amygdaloid complex and basolateral division in the human and ape brain. *Am J Phys Anthropol*. 134(3):392–403. doi:10.1002/ajpa.20684.
- Berretta S, Pantazopoulos H, Lange N. 2007. Neuron Numbers and Volume of the Amygdala in Subjects Diagnosed with Bipolar Disorder or Schizophrenia. *Biol Psychiatry*. 62(8):884–893. doi:10.1016/j.biopsych.2007.04.023. <https://linkinghub.elsevier.com/retrieve/pii/S0006322307003575>.
- Cao L, Li H, Liu J, Jiang J, Li B, Li X, Zhang S, Gao Y, Liang K, Hu Xinyue, et al. 2022. Disorganized functional architecture of amygdala subregional networks in obsessive-compulsive disorder. *Commun Biol*. 5(1). doi:10.1038/s42003-022-04115-z.
- Caparelli EC, Ross TJ, Gu H, Liang X, Stein EA, Yang Y. 2017. Graph theory reveals amygdala modules consistent with its anatomical subdivisions. *Sci Rep*. 7(1):14392. doi:10.1038/s41598-017-14613-4. <http://www.nature.com/articles/s41598-017-14613-4>.
- Carlo CN, Stefanacci L, Semendeferi K, Stevens CF. 2010. Comparative analyses of the neuron numbers and volumes of the amygdaloid complex in old and new world primates. *Journal of Comparative Neurology*. 518(8):1176–1198. doi:10.1002/cne.22264.
- Chareyron LJ, Banta Lavenex P, Amaral DG, Lavenex P. 2011. Stereological analysis of the rat and monkey amygdala. *Journal of Comparative Neurology*. 519(16):3218–3239. doi:10.1002/cne.22677. <https://onlinelibrary.wiley.com/doi/10.1002/cne.22677>.
- Chareyron LJ, Lavenex PB, Amaral DG, Lavenex P. 2012. Postnatal development of the amygdala: A stereological study in macaque monkeys. *Journal of Comparative Neurology*. 520(9):1965–1984. doi:10.1002/cne.23023.
- Coombs G, Loggia ML, Greve DN, Holt DJ. 2014. Amygdala perfusion is predicted by its functional connectivity with the ventromedial prefrontal cortex and negative affect. *PLoS One*. 9(5). doi:10.1371/journal.pone.0097466.
- Eckstein M, Markett S, Kendrick KM, Ditzen B, Liu F, Hurlmann R, Becker B. 2017. Oxytocin differentially alters resting state functional connectivity between amygdala subregions and emotional control networks: Inverse correlation with depressive traits. *Neuroimage*. 149:458–467. doi:10.1016/j.neuroimage.2017.01.078.
- Emery NJ, Capitanio JP, Mason WA, Machado CJ, Mendoza SP, Amaral DG. 2001. The effects of bilateral lesions of the amygdala on dyadic social interactions in rhesus monkeys (*Macaca mulatta*). *Behavioral Neuroscience*. 115(3):515–544. doi:10.1037/0735-7044.115.3.515. <http://doi.apa.org/getdoi.cfm?doi=10.1037/0735-7044.115.3.515>.
- Engman J, Linnman C, Van Dijk KRA, Milad MR. 2016. Amygdala subnuclei resting-state functional connectivity sex and estrogen differences. *Psychoneuroendocrinology*. 63:34–42. doi:10.1016/j.psyneuen.2015.09.012. <https://linkinghub.elsevier.com/retrieve/pii/S0306453015009154>.
- García-Amado M, Prensa L. 2012. Stereological Analysis of Neuron, Glial and Endothelial Cell Numbers in the Human Amygdaloid Complex. Reddy H, editor. *PLoS One*. 7(6):e38692. doi:10.1371/journal.pone.0038692. <https://dx.plos.org/10.1371/journal.pone.0038692>.



Kedo O, Zilles K, Palomero-Gallagher N, Schleicher A, Mohlberg H, Bludau S, Amunts K. 2018. Receptor-driven, multimodal mapping of the human amygdala. *Brain Struct Funct.* 223(4):1637–1666. doi:10.1007/s00429-017-1577-x.

Kerestes R, Chase HW, Phillips ML, Ladouceur CD, Eickhoff SB. 2017. Multimodal evaluation of the amygdala's functional connectivity. *Neuroimage.* 148:219–229. doi:10.1016/j.neuroimage.2016.12.023. <https://linkinghub.elsevier.com/retrieve/pii/S1053811916307455>.

Lew CH, Groeniger KM, Bellugi U, Stefanacci L, Schumann CM, Semendeferi K. 2018. A postmortem stereological study of the amygdala in Williams syndrome. *Brain Struct Funct.* 223(4):1897–1907. doi:10.1007/s00429-017-1592-y.

Nicholson AA, Densmore M, Frewen PA, Théberge J, Neufeld RW, McKinnon MC, Lanius RA. 2015. The Dissociative Subtype of Posttraumatic Stress Disorder: Unique Resting-State Functional Connectivity of Basolateral and Centromedial Amygdala Complexes. *Neuropsychopharmacology.* 40(10):2317–2326. doi:10.1038/npp.2015.79. <http://www.nature.com/articles/npp201579>.

Roy AK, Shehzad Z, Margulies DS, Kelly AMC, Uddin LQ, Gotimer K, Biswal BB, Castellanos FX, Milham MP. 2009. Functional connectivity of the human amygdala using resting state fMRI. *Neuroimage.* 45(2):614–626. doi:10.1016/j.neuroimage.2008.11.030. <https://linkinghub.elsevier.com/retrieve/pii/S1053811908012214>.

Rubinow MJ, Mahajan G, May W, Overholser JC, Jurjus GJ, Dieter L, Herbst N, Steffens DC, Miguel-Hidalgo JJ, Rajkowska G, et al. 2016. Basolateral amygdala volume and cell numbers in major depressive disorder: a postmortem stereological study. *Brain Struct Funct.* 221(1):171–184. doi:10.1007/s00429-014-0900-z.

Schumann CM, Amaral DG. 2005. Stereological estimation of the number of neurons in the human amygdaloid complex. *Journal of Comparative Neurology.* 491(4):320–329. doi:10.1002/cne.20704.

Schumann CM, Amaral DG. 2006. Stereological analysis of amygdala neuron number in autism. *Journal of Neuroscience.* 26(29):7674–7679. doi:10.1523/JNEUROSCI.1285-06.2006.

Shao Y, Lei Y, Wang L, Zhai T, Jin X, Ni W, Yang Y, Tan S, Wen B, Ye E, et al. 2014. Altered resting-state amygdala functional connectivity after 36 hours of total sleep deprivation. *PLoS One.* 9(11). doi:10.1371/journal.pone.0112222.

Stimpson CD, Barger N, Tagliabue JP, Gendron-Fitzpatrick A, Hof PR, Hopkins WD, Sherwood CC. 2016. Differential serotonergic innervation of the amygdala in bonobos and chimpanzees. *Soc Cogn Affect Neurosci.* 11(3):413–422. doi:10.1093/scan/nsv128. <https://academic.oup.com/scan/article-lookup/doi/10.1093/scan/nsv128>.

Sylvester CM, Yu Q, Benjamin Srivastava A, Marek S, Zheng A, Alexopoulos D, Smyser CD, Shimony JS, Ortega M, Dierker DL, et al. 2020. Individual-specific functional connectivity of the amygdala: A substrate for precision psychiatry. *Proc Natl Acad Sci U S A.* 117(7):3808–3818. doi:10.1073/pnas.1910842117.

Tahmasian M, Knight DC, Manoliu A, Schwerthöffer D, Scherr M, Meng C, Shao J, Peters H, Doll A, Khazaie H, et al. 2013. Aberrant intrinsic connectivity of hippocampus and amygdala overlap in the fronto-insular and dorsomedial-prefrontal cortex in major depressive disorder. *Front Hum Neurosci.(OCT).* doi:10.3389/fnhum.2013.00639.

Villard J, Bennett JL, Bliss-Moreau E, Capitanio JP, Fox NA, Amaral DG, Lavenex P. 2021. Structural differences in the hippocampus and amygdala of behaviorally inhibited macaque monkeys. *Hippocampus.* 31(8):858–868. doi:10.1002/hipo.23329.

Wegiel Jerzy, Flory M, Kuchna I, Nowicki K, Ma SY, Imaki H, Wegiel Jarek, Cohen IL, London E, Wisniewski T, et al. 2014. Stereological study of the neuronal number and volume of 38 brain subdivisions of subjects diagnosed with autism reveals significant alterations restricted to the striatum, amygdala and cerebellum. *Acta Neuropathol Commun.* 2(1):141. doi:10.1186/s40478-014-0141-7.

Zhang X, Cheng H, Zuo Z, Zhou K, Cong F, Wang B, Zhuo Y, Chen L, Xue R, Fan Y. 2018. Individualized Functional Parcellation of the Human Amygdala Using a Semi-supervised Clustering Method: A 7T Resting State fMRI Study. *Front Neurosci.* 12. doi:10.3389/fnins.2018.00270. <http://journal.frontiersin.org/article/10.3389/fnins.2018.00270/full>.
